# Supplementary material for: N-Acetylcysteine Reduces the Pro-Oxidant and Inflammatory Responses during Pancreatitis and Pancreas Tumorigenesis
Source: MDPI journal article supplement (doi:10.3390/antiox10071107), 2021-07-11
Supplement: s1 [file s1]

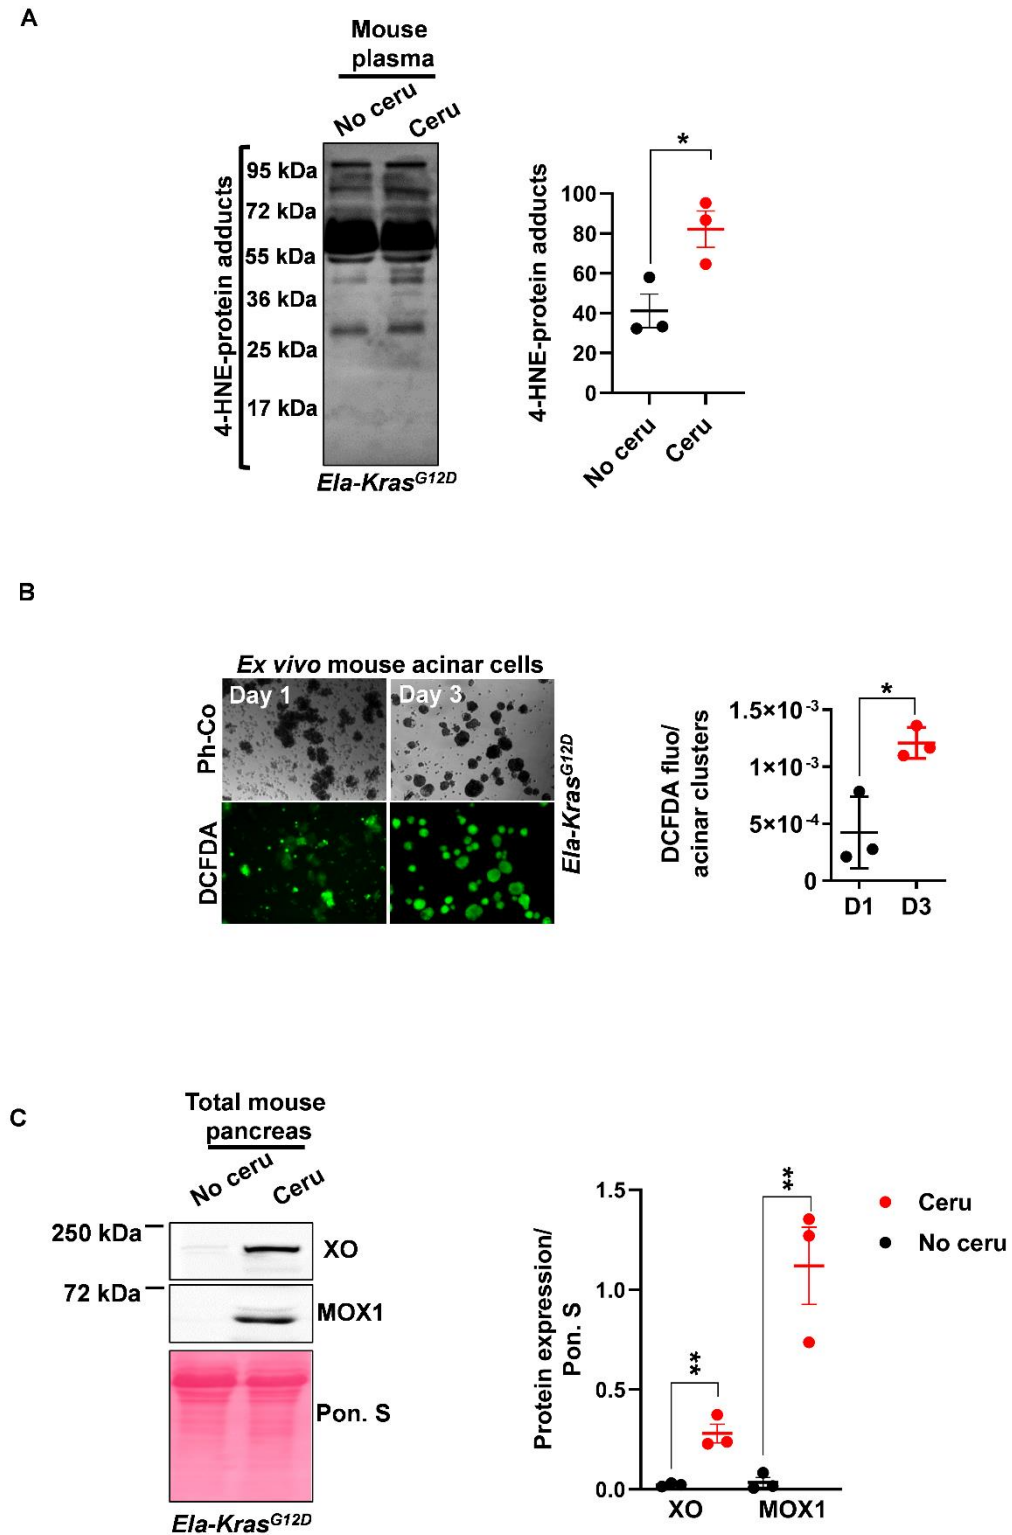

**Figure S1.** Pancreatitis induces a pro-oxidant response in *Ela-Kras<sup>G12D</sup>* pancreata. (A) Western blot for the oxidative damage marker, 4-hydroxynonenal (4-HNE) on the plasma of *Ela-Kras<sup>G12D</sup>* mice treated with cerulein for 5 days (n=3) or untreated (n=3). The corresponding densitometry analysis is also available as a bar graph. (B) Reactive oxygen species (ROS) were measured in cultured acinar cells *ex vivo* at days 1 (normal) and 3 (metaplasia), using the DCFDA probe; these cells were isolated from *Ela-Kras<sup>G12D</sup>* pancreata and cultured under conditions mimicking inflammation (n=3). Three independent cultures from three different mice were tested. The quantification of DCFDA fluorescence is available as a bar graph. (C) Western blot on pancreas lysates of *Ela-Kras<sup>G12D</sup>* mice treated with cerulein for 5 days (n=3) or untreated (n=3). The corresponding densitometry analysis is also available as a bar graph. Analyzed enzymes are xanthine oxidase (XO) and mitogenic oxidase-1 (MOX1). Data are mean  $\pm$  SEM. Statistical significance for all panels was tested by Student t-test (\*  $P < 0.05$ , \*\*  $P < 0.01$ ). All quantifications in the figure show biological replicates.

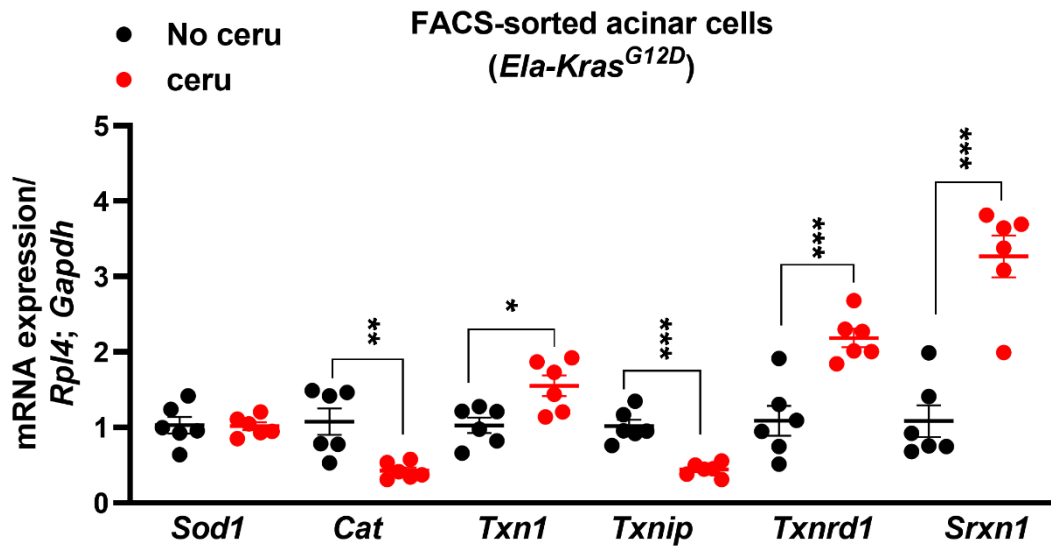

**Figure S2.** Pancreatitis provokes significant redox changes in pancreatic acinar cells. Quantitative PCR analysis for antioxidant genes on FACS-sorted acinar cells from *Ela-Kras<sup>G12D</sup>* mice treated with cerulein for 3 days (n=6) or untreated (n=6). *Ribosomal protein L4 (Rpl4)* and *glyceraldehyde-3-phosphate dehydrogenase (Gapdh)* were used as housekeeping genes. Data are mean  $\pm$  SEM. Statistical significance was tested by Student t-test (\*  $P < 0.05$ , \*\*  $P < 0.01$ , \*\*\*  $P < 0.001$ ). All quantifications in the figure show biological replicates.

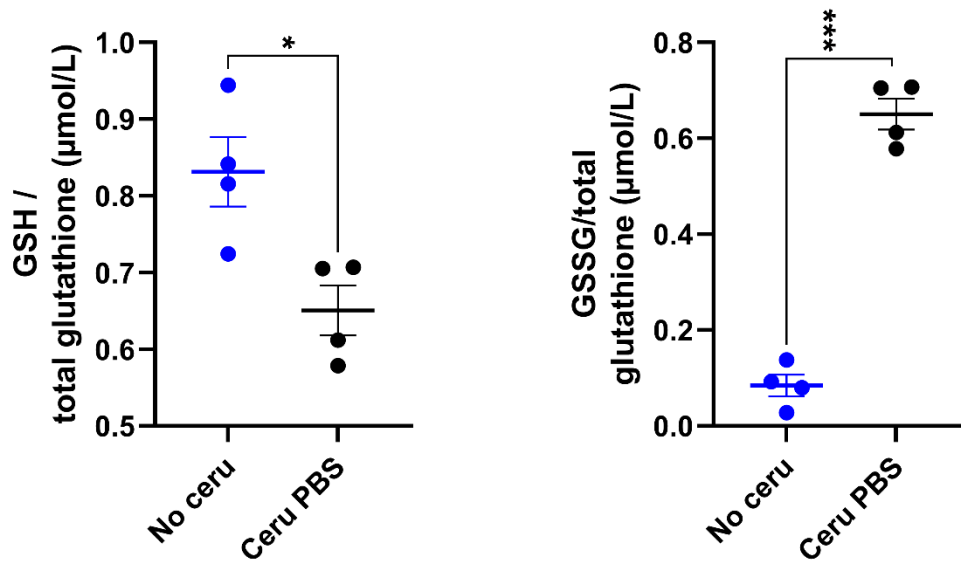

**Figure S3.** Pancreatitis induces glutathione oxidation in the pancreas. Reduced glutathione (GSH) and disulfide glutathione (GSSG) levels in pancreas lysates of *wild-type* mice treated with cerulein for 1 day (Ceru PBS; n=4) or untreated (No ceru; n=4). Data are mean  $\pm$  SEM. Statistical significance for all panels was tested by Student t-test (\*  $P < 0.05$ , \*\*\*  $P < 0.001$ ). All quantifications in the figure show biological replicates.

### 5-day cerulein and NAC treatment

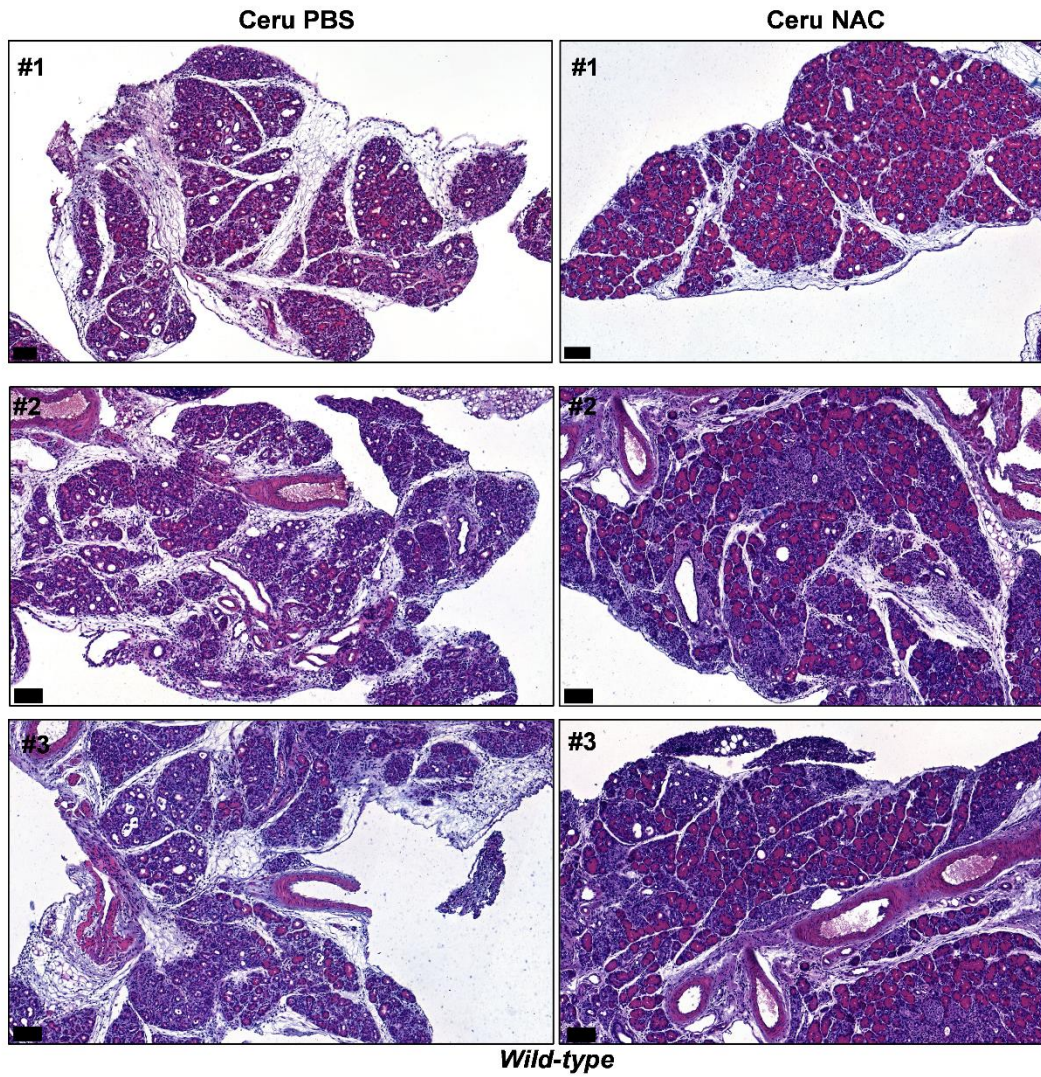

**Figure S4.** N-acetylcysteine treatment reduces pancreatic edema in *wild-type* pancreata during pancreatitis. Individual tissue scans of hematoxylin and eosin (H&E) staining showing the whole pancreas architecture of *wild-type* mice treated with cerulein and PBS for 5 days (Ceru PBS) or cerulein and NAC for 5 days (Ceru NAC). Three images are displayed for each group. Bars: 200 μm. These scans are related to the edematous area quantification shown in the bar graph of Figure 4D-E. Images are biological replicates.



### 5-day cerulein and NAC treatment

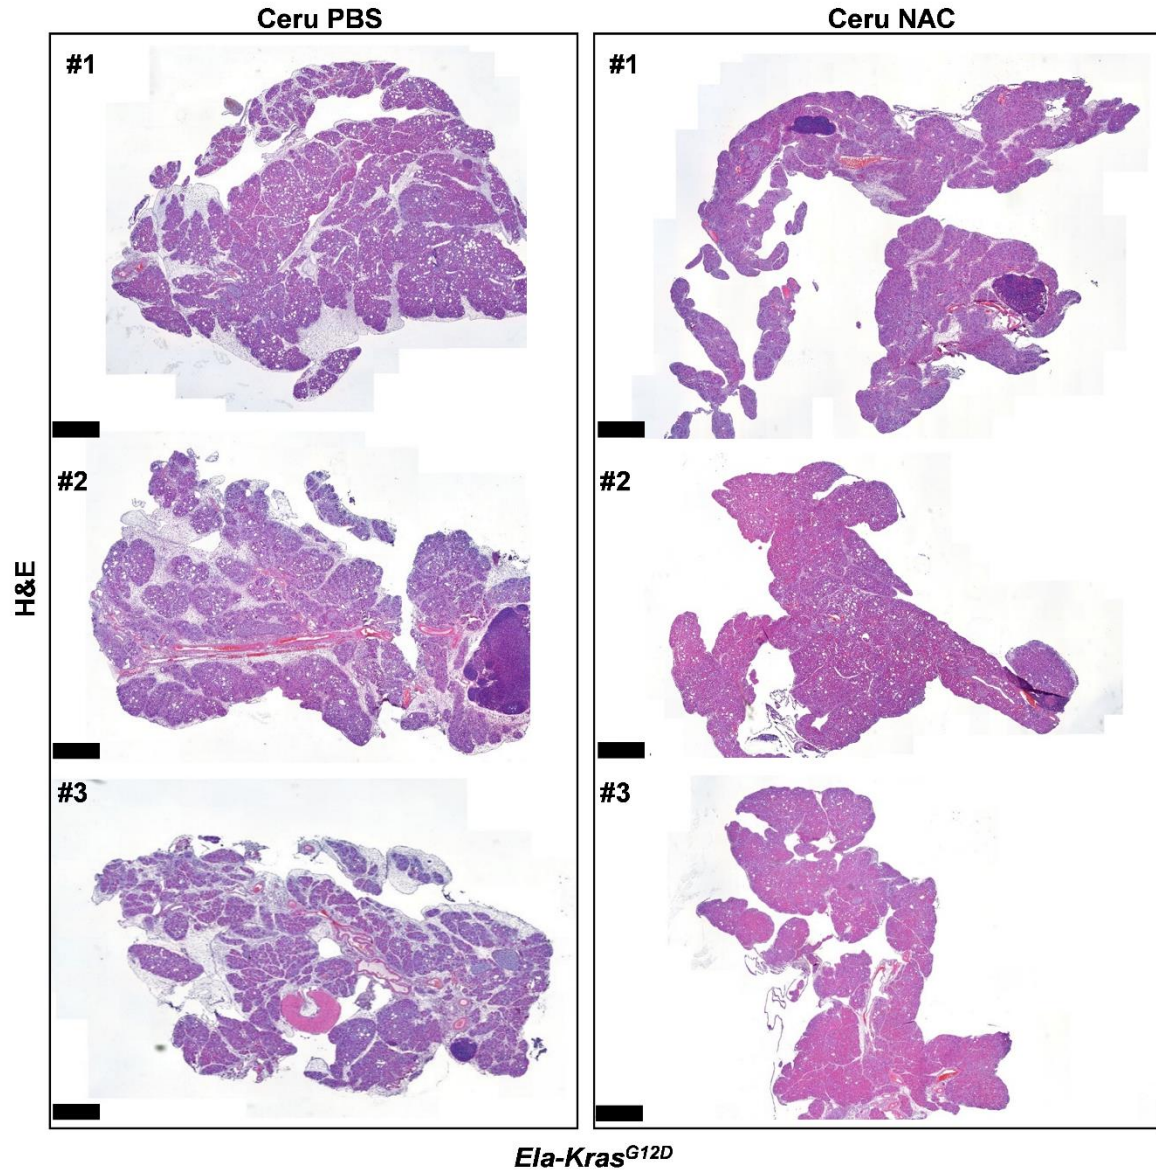

**Figure S5.** N-acetylcysteine treatment reduces pancreatic edema in *Ela-Kras<sup>G12D</sup>* pancreata during pancreatitis. Individual tissue scans of hematoxylin and eosin (H&E) staining showing the whole pancreas architecture of *Ela-Kras<sup>G12D</sup>* mice treated with cerulein and PBS for 5 days (Cerु PBS) or cerulein and NAC for 5 days (Cerु NAC). Three images are displayed for each group. Bars: 1000  $\mu$ m. These scans are related to the edematous area quantification shown in the bar graph of Figure 5D-E. Images are biological replicates.

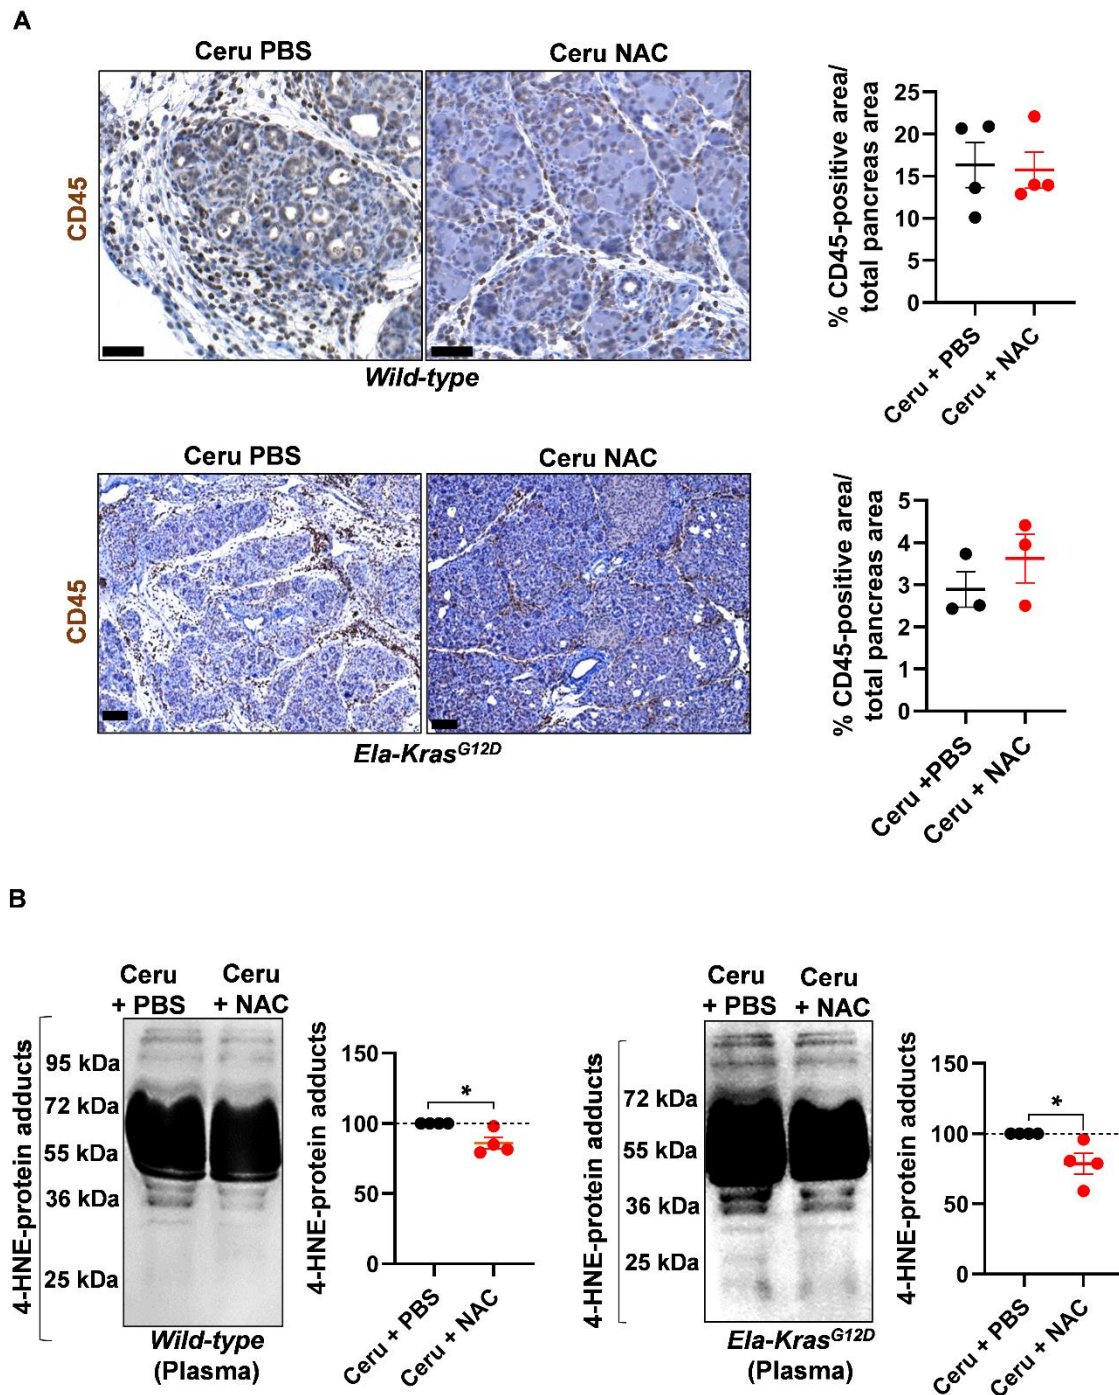

**Figure S6.** N-acetylcysteine treatment reduces systemic oxidative damage in *wild-type* and *Ela-Kras<sup>G12D</sup>* pancreata during pancreatitis. **(A)** CD45 immunohistochemistry on the pancreata of *wild-type* and *Ela-Kras<sup>G12D</sup>* mice treated with cerulein and PBS for 5 days (Ceru PBS; n=4 for both *wild-type* and *Ela-Kras<sup>G12D</sup>*) or cerulein and NAC for 5 days (Ceru NAC; n=4 for both *wild-type* and *Ela-Kras<sup>G12D</sup>*). Bars: 50  $\mu$ m. The corresponding quantification is also displayed as a bar graph. **(B)** Western blot for the oxidative damage marker, 4-hydroxynonenal (4-HNE) on the plasma of *wild-type* and *Ela-Kras<sup>G12D</sup>* mice treated with cerulein and PBS for 5 days (Ceru PBS; n=4 for both *wild-type* and *Ela-Kras<sup>G12D</sup>*) or cerulein and NAC for 5 days (Ceru NAC; n=4 for both *wild-type* and *Ela-Kras<sup>G12D</sup>*). The corresponding densitometry analysis is also available as a bar graph. Data are mean  $\pm$  SEM. Statistical significance for all panels was tested by Student t-test (\*  $P < 0.05$ ). A statistical tendency was considered when  $P$ -values were  $0.05 > P > 0.1$ . All quantifications in the figure show biological replicates.

**A**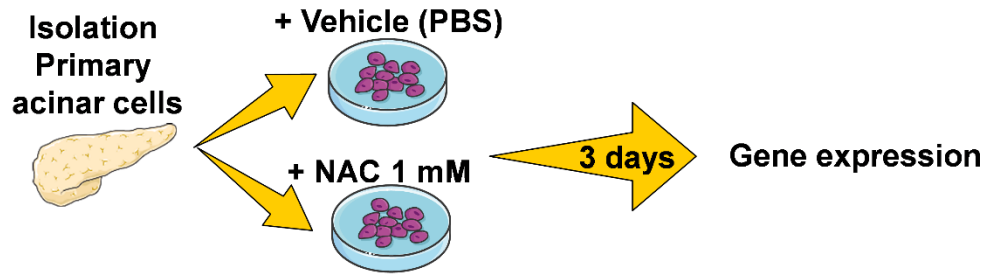**B**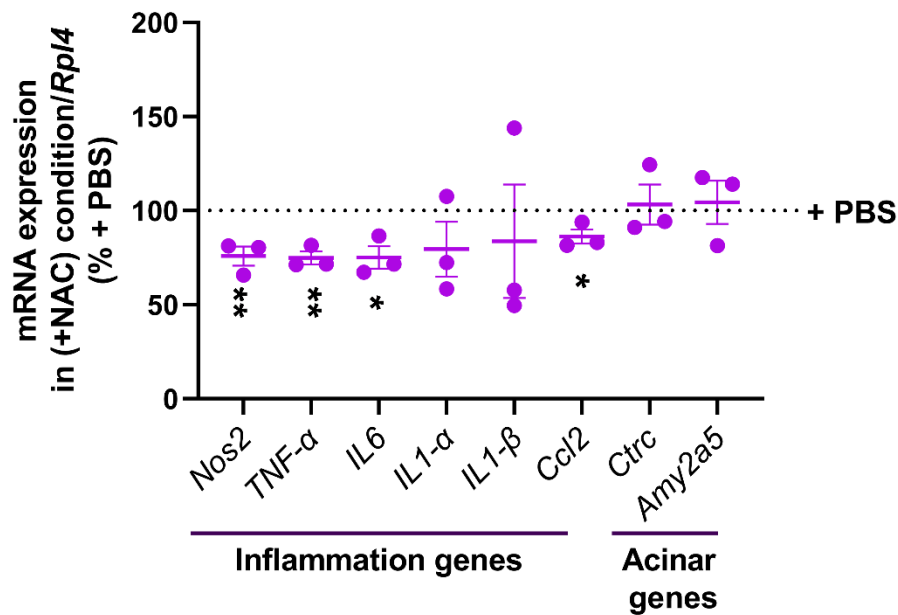

**Figure S7.** N-acetylcysteine treatment reduces the expression of pro-oxidant and pro-inflammatory genes in primary acinar cells from *Ela-Kras<sup>G12D</sup>* pancreata. **(A)** Illustration of the used *ex vivo* acinar cell culture. Acinar cells were isolated from the pancreata of *Ela-Kras<sup>G12D</sup>* mice and then cultured for 3 days (metaplastic cells). Cells were treated with either NAC (1 mM) or vehicle (PBS) from the onset of the culture and until 3 days. **(B)** Quantitative PCR analysis for different pro-oxidant and inflammatory genes on PBS- or NAC-treated acinar cells treated for 3 days (n=3). *Ribosomal protein L4 (Rpl4)* was used as housekeeping genes. Data are mean  $\pm$  SEM. Three independent cultures from three different mice were tested. Statistical significance was tested by Student t-test (\*  $P < 0.05$ , \*\*  $P < 0.01$ ). The dotted line represent the expression level in PBS-treated acinar cells, which was set at 100%. All quantifications in the figure show biological replicates.
